# Supplementary material for: Non-muscular myosin light chain kinase triggers intermittent hypoxia-induced interleukin-6 release, endothelial dysfunction and permeability
Source: PubMed Central journal article supplement (PMC5651916; doi:10.1038/s41598-017-13268-5), 2017-10-20
Supplement: 41598_2017_13268_MOESM1_ESM.pdf [file 41598_2017_13268_MOESM1_ESM.pdf]

**Non-muscular myosin light chain kinase triggers intermittent hypoxia-induced interleukin-6 release, endothelial dysfunction and permeability**

Sylvain Recoquillon, Manuel Gómez-Guzmán, Marion Rodier, Camille Koffi, Mathieu Nitiéma, Frédéric Gagnadoux, M. Carmen Martínez, Ramaroson Andriantsitohaina

### p-eNOS (6 hours) in figure 2

- 1 = Ctl
- 2 = ML-7
- 3 = IH
- 4 = IH + ML-7

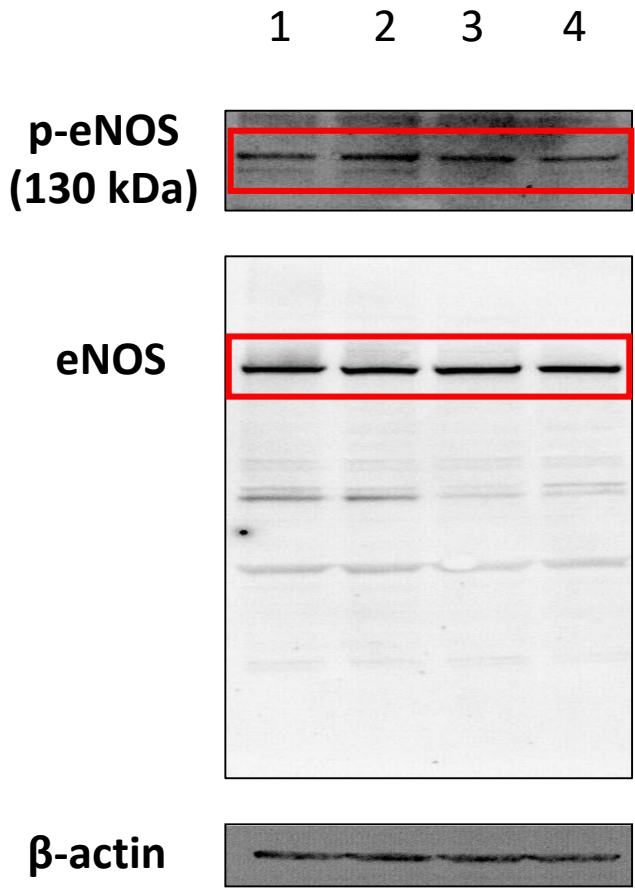

Supplementary Figure 1. Unprocessed images of the key immunoblots of Figure 2. Boxes indicate image areas shown in the indicated panels.

### I $\kappa$ B (6 hours) in figure 3

- 1 = Ctl
- 2 = ML-7
- 3 = IH
- 4 = IH + ML-7

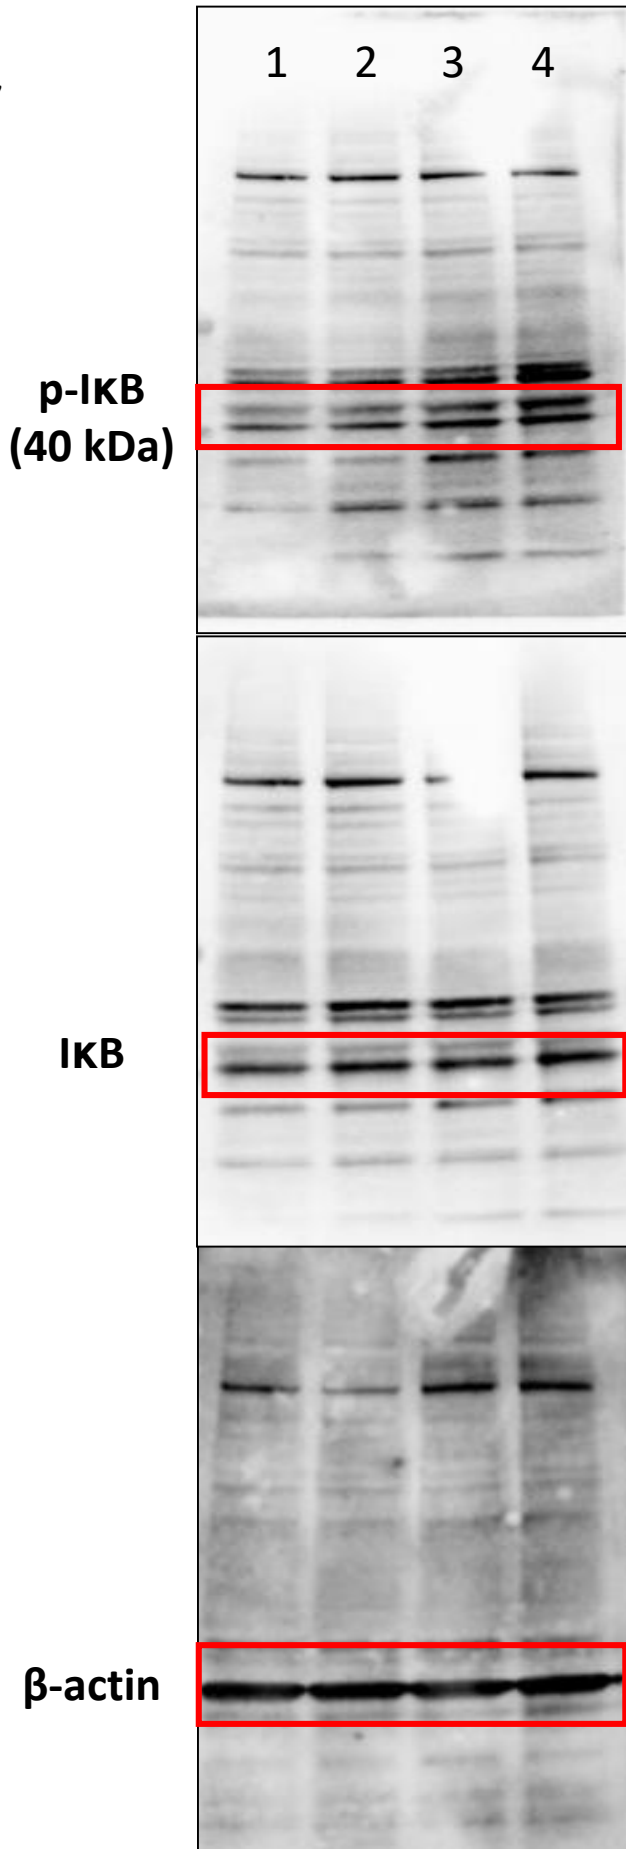

Supplementary Figure 2. Unprocessed images of the key immunoblots of Figure 3. Boxes indicate image areas shown in the indicated panels.

### p65 (6 hours) in figure 3

- 1 = Ctl
- 2 = ML-7
- 3 = IH
- 4 = IH + ML-7

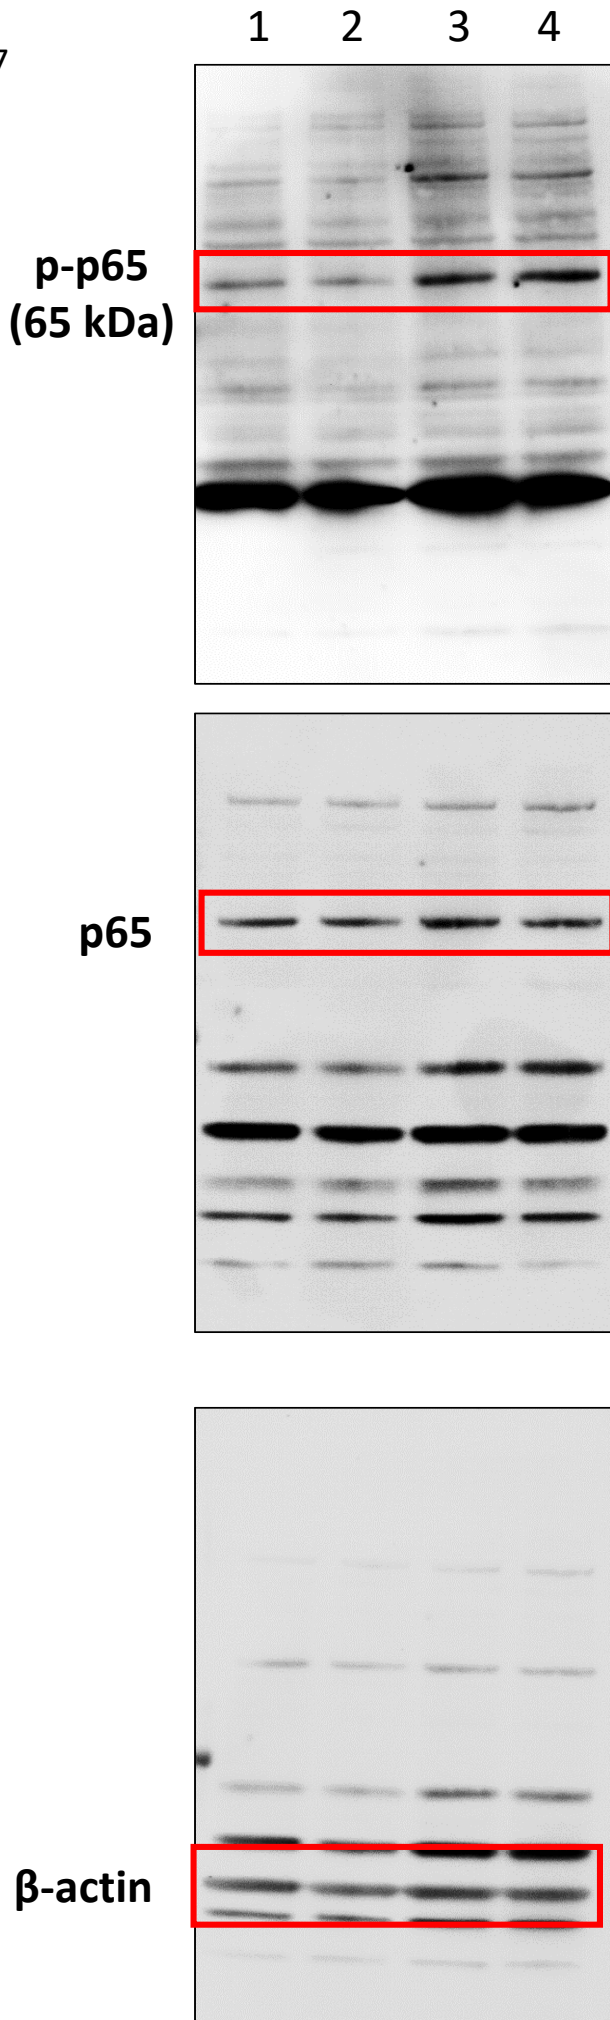

Supplementary Figure 3. Unprocessed images of the key immunoblots of Figure 3. Boxes indicate image areas shown in the indicated panels.

**p-p65 (6 hours) in figure 4**

- 1 = Ctl
- 2 = BFA
- 3 = IH
- 4 = IH + BFA

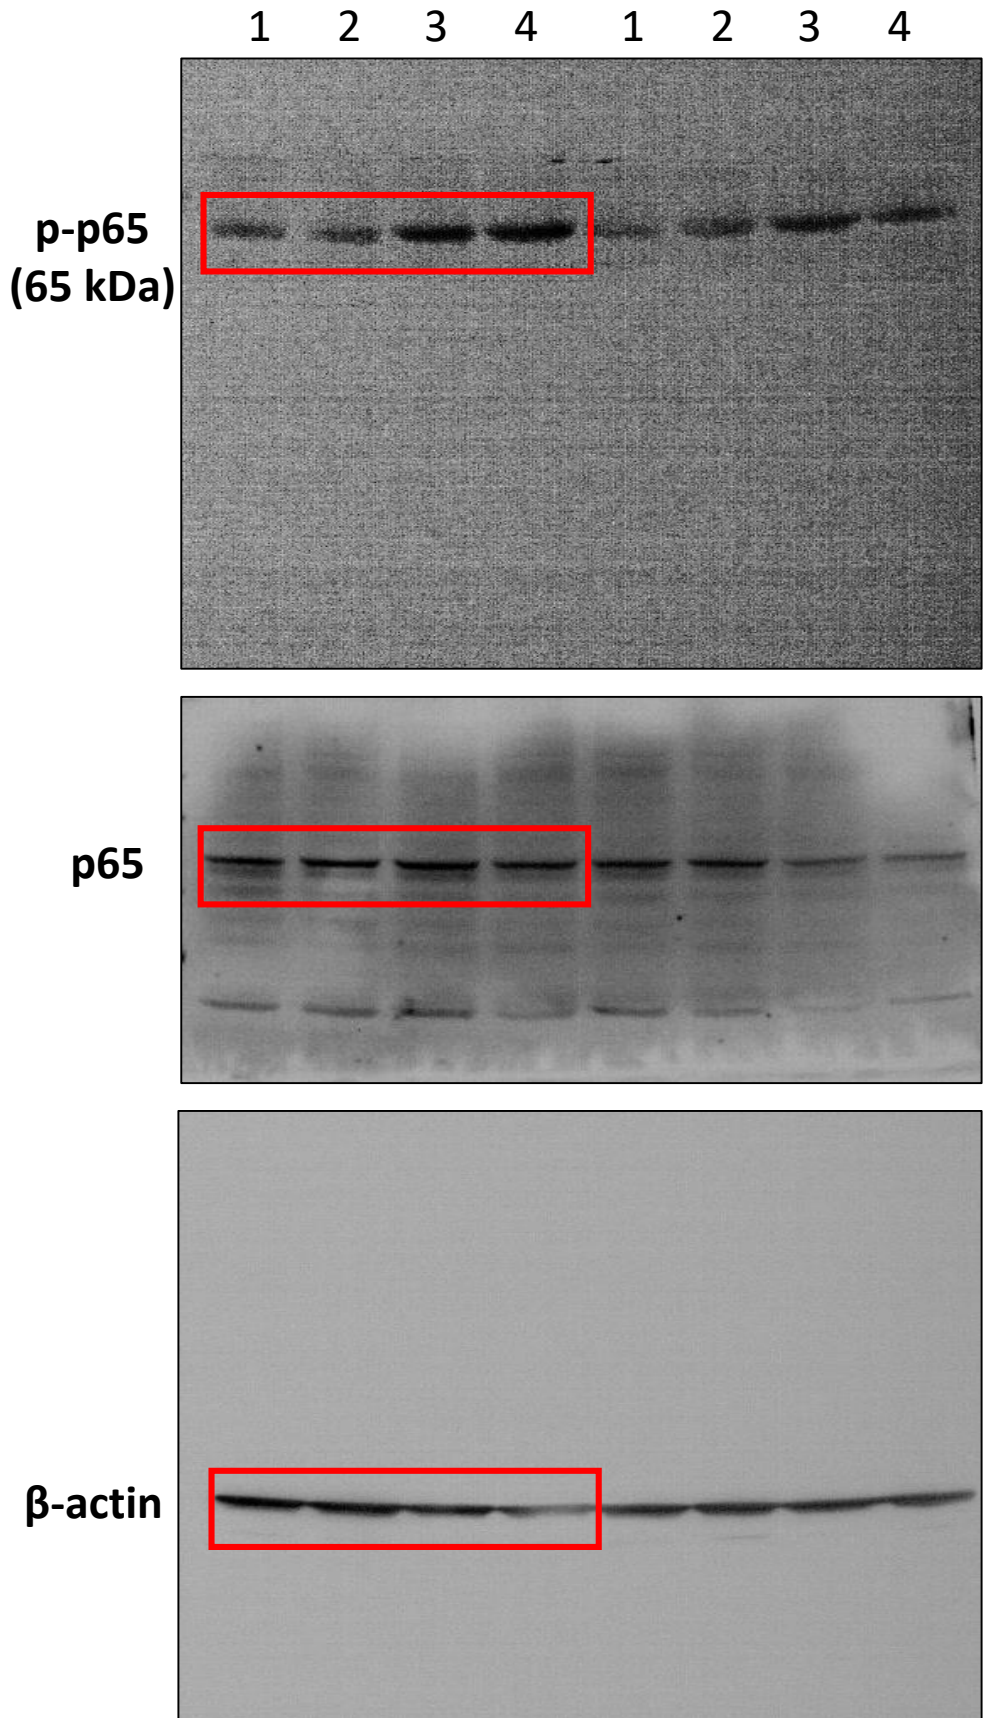

Supplementary Figure 4. Unprocessed images of the key immunoblots of Figure 4. Boxes indicate image areas shown in the indicated panels.
